# Supplementary material for: Transition into and out of daylight saving time and spontaneous delivery: a population-based study
Source: PubMed Central journal article supplement — BMJ Open. 2016 Sep 14;6(9):e010925. doi: 10.1136/bmjopen-2015-010925 (PMC5030578; doi:10.1136/bmjopen-2015-010925), 2016-09-14
Supplement: bmjopen-2015-010925supp_tables.pdf [file bmjopen-2015-010925supp_tables.pdf]

## Supplementary material

**Supplementary Table 1.** Risk ratios comparing the number of spontaneous deliveries in the week after the transition into daylight saving time (spring) with the mean number of spontaneous deliveries in (1) the week that was two weeks before and the week that was two weeks after the exposure period, (2) the week that was three weeks before and the week that was three weeks after the exposure period, and (3) the week before the exposure period

| Comparison unit | Observed* | The comparison period is the week that was two weeks before and the week that was two weeks after the exposure period |                     | The comparison period is the week that was three weeks before and the week that was three weeks after the exposure period |                     | The comparison period is the week that preceded the exposure period |                     |
|-----------------|-----------|-----------------------------------------------------------------------------------------------------------------------|---------------------|---------------------------------------------------------------------------------------------------------------------------|---------------------|---------------------------------------------------------------------|---------------------|
|                 |           | Expected†                                                                                                             | RR (95% CI)         | Expected‡                                                                                                                 | RR (95% CI)         | Expected¶                                                           | RR (95% CI)         |
| Whole week      | 18,519.2  | 18,466.0                                                                                                              | 1.003 (0.988-1.017) | 18,278.5                                                                                                                  | 1.013 (0.999-1.028) | 18,220                                                              | 1.016 (1.002-1.031) |
| Sunday**        | 2,549.2   | 2,536.0                                                                                                               | 1.005 (0.967-1.045) | 2,512.0                                                                                                                   | 1.015 (0.976-1.055) | 2,492                                                               | 1.023 (0.984-1.063) |
| Monday          | 2,774.0   | 2,708.0                                                                                                               | 1.024 (0.987-1.063) | 2,753.0                                                                                                                   | 1.008 (0.970-1.046) | 2,748                                                               | 1.009 (0.972-1.048) |
| Tuesday         | 2,716.0   | 2,680.5                                                                                                               | 1.013 (0.975-1.052) | 2,693.0                                                                                                                   | 1.009 (0.971-1.047) | 2,633                                                               | 1.032 (0.993-1.071) |
| Wednesday       | 2,739.0   | 2,678.0                                                                                                               | 1.023 (0.985-1.062) | 2,577.5                                                                                                                   | 1.063 (1.023-1.103) | 2,631                                                               | 1.041 (1.002-1.081) |

|          |         |         |                     |         |                     |       |                     |
|----------|---------|---------|---------------------|---------|---------------------|-------|---------------------|
| Thursday | 2,621.0 | 2,716.5 | 0.965 (0.928-1.003) | 2,613.0 | 1.003 (0.965-1.042) | 2,612 | 1.003 (0.965-1.043) |
| Friday   | 2,609.0 | 2,605.0 | 1.002 (0.963-1.041) | 2,613.0 | 0.998 (0.961-1.038) | 2,636 | 0.990 (0.952-1.028) |
| Saturday | 2,511.0 | 2,542.0 | 0.988 (0.950-1.027) | 2,517.0 | 0.998 (0.959-1.037) | 2,468 | 1.017 (0.978-1.058) |

RR = risk ratio, CI = confidence intervals.

\*Observed = number of spontaneous deliveries during the week following the spring transition.

†Expected = number of spontaneous deliveries during the week two weeks before and the week two weeks after the week following the spring transition divided by two.

‡Expected = number of spontaneous deliveries during the week three weeks before and the week three weeks after the week following the spring transition divided by two.

¶Expected = number of spontaneous deliveries during the week before the spring transition.

\*\*The number of deliveries on the Sunday following the transition into daylight saving time was adjusted for the shorter day length (23 instead of 24 hours).

**Supplementary Table 2.** Risk ratios comparing the number of spontaneous preterm deliveries in the week after the transition into daylight saving time (spring) with the mean number of spontaneous preterm deliveries in the week before and the week after this period

| Comparison unit | Number of spontaneous preterm deliveries |           | RR (95% CI)         |
|-----------------|------------------------------------------|-----------|---------------------|
|                 | Observed*                                | Expected† |                     |
| Whole week      | 874.3                                    | 922.5     | 0.948 (0.886-1.013) |
| Sunday‡         | 127.3                                    | 120.5     | 1.056 (0.881-1.257) |
| Monday          | 125.0                                    | 143.0     | 0.874 (0.728-1.041) |
| Tuesday         | 139.0                                    | 141.0     | 0.986 (0.829-1.164) |
| Wednesday       | 122.0                                    | 127.0     | 0.961 (0.798-1.147) |
| Thursday        | 140.0                                    | 133.5     | 1.049 (0.882-1.237) |
| Friday          | 112.0                                    | 132.5     | 0.845 (0.696-1.017) |
| Saturday        | 109.0                                    | 125.0     | 0.872 (0.716-1.052) |

RR = risk ratio, CI = confidence intervals.

\*Observed = number of spontaneous preterm deliveries during the week following the spring daylight saving time transition.

†Expected = number of spontaneous preterm deliveries during the week before and the week after the week following the spring daylight saving time transition divided by two.

‡The number of spontaneous deliveries on the Sunday following the transition into daylight saving time was adjusted for the change in day length (23 instead of 24 hours).

**Supplementary Table 3.** Risk ratios comparing the number of spontaneous deliveries in the week after the transition out of daylight saving time (autumn) with the mean number of spontaneous deliveries in (1) the week that was two weeks before and the week that was two weeks after the exposure period and (2) the week that was three weeks before and the week that was three weeks after the exposure period, and (3) the week before the exposure period

| Comparison unit | Observed* | The comparison period is the week that was two weeks before and the week that was two weeks after the exposure period |                     | The comparison period is the week that was three weeks before and the week that was three weeks after the exposure period |                     | The comparison period is the week that preceded the exposure period |                     |
|-----------------|-----------|-----------------------------------------------------------------------------------------------------------------------|---------------------|---------------------------------------------------------------------------------------------------------------------------|---------------------|---------------------------------------------------------------------|---------------------|
|                 |           | Expected†                                                                                                             | RR (95% CI)         | Expected‡                                                                                                                 | RR (95% CI)         | Expected¶                                                           | RR (95% CI)         |
| Whole week      | 19,072.9  | 19,084.5                                                                                                              | 0.999 (0.985-1.014) | 19,114.5                                                                                                                  | 0.998 (0.984-1.012) | 19,218                                                              | 0.992 (0.978-1.007) |
| Sunday**        | 2,617.9   | 2,730.0                                                                                                               | 0.959 (0.923-0.996) | 2,682.0                                                                                                                   | 0.976 (0.939-1.014) | 2,706                                                               | 0.967 (0.931-1.005) |
| Monday          | 2,841.0   | 2,852.0                                                                                                               | 0.996 (0.960-1.033) | 2,862.5                                                                                                                   | 0.992 (0.956-1.030) | 2,845                                                               | 0.999 (0.962-1.036) |
| Tuesday         | 2,720.0   | 2,763.5                                                                                                               | 0.984 (0.948-1.022) | 2,789.5                                                                                                                   | 0.975 (0.939-1.012) | 2,868                                                               | 0.948 (0.913-0.985) |
| Wednesday       | 2,708.0   | 2,747.0                                                                                                               | 0.986 (0.949-1.024) | 2,745.5                                                                                                                   | 0.986 (0.950-1.024) | 2,813                                                               | 0.963 (0.927-1.000) |
| Thursday        | 2,812.0   | 2,722.0                                                                                                               | 1.033 (0.995-1.072) | 2,769.0                                                                                                                   | 1.016 (0.978-1.054) | 2,708                                                               | 1.038 (1.000-1.078) |

|          |         |         |                     |         |                     |       |                     |
|----------|---------|---------|---------------------|---------|---------------------|-------|---------------------|
| Friday   | 2,690.0 | 2,667.5 | 1.008 (0.971-1.047) | 2,726.0 | 0.987 (0.950-1.025) | 2,755 | 0.976 (0.940-1.014) |
| Saturday | 2,684.0 | 2,602.5 | 1.031 (0.993-1.071) | 2,540.0 | 1.057 (1.017-1.097) | 2,523 | 1.064 (1.024-1.105) |

RR = risk ratio, CI = confidence intervals.

\*Observed = number of spontaneous deliveries during the week following the autumn transition.

†Expected = number of spontaneous deliveries during the week two weeks before and the week two weeks after the week following the autumn transition divided by two.

‡Expected = number of spontaneous deliveries during the week three weeks before and the week three weeks after the week following the autumn transition divided by two.

¶Expected = number of spontaneous deliveries during the week before the autumn transition.

\*\*The number of deliveries on the Sunday following the transition out of daylight saving time was adjusted for the longer day length (25 instead of 24 hours).

**Supplementary Table 4.** Risk ratios comparing the number of spontaneous preterm deliveries in the week after the transition out daylight saving time (autumn) with the mean number of spontaneous preterm deliveries in the week before and the week after this period

| Comparison unit | Number of spontaneous preterm deliveries |           | RR (95% CI)         |
|-----------------|------------------------------------------|-----------|---------------------|
|                 | Observed*                                | Expected† |                     |
| Whole week      | 918.6                                    | 976.5     | 0.941 (0.881-1.004) |
| Sunday‡         | 129.6                                    | 134.5     | 0.964 (0.805-1.144) |
| Monday          | 127.0                                    | 143.0     | 0.888 (0.740-1.057) |
| Tuesday         | 118.0                                    | 137.0     | 0.861 (0.713-1.031) |
| Wednesday       | 135.0                                    | 140.5     | 0.961 (0.806-1.137) |
| Thursday        | 142.0                                    | 138.0     | 1.029 (0.867-1.213) |
| Friday          | 155.0                                    | 144.5     | 1.073 (0.910-1.255) |
| Saturday        | 112.0                                    | 139.0     | 0.806 (0.663-0.970) |

RR = risk ratio, CI = confidence intervals.

\*Observed = number of spontaneous preterm deliveries during the week following the daylight saving time transition.

†Expected = number of spontaneous preterm deliveries during the week before and the week after the week following the daylight saving time transition divided by two.

‡The number of spontaneous deliveries on the Sunday following the transition out of daylight saving time was adjusted for the change in day length (25 instead of 24 hours).
